# Supplementary material for: A Genetic Screen to Discover Pathways Affecting Cohesin Function in Schizosaccharomyces pombe Identifies Chromatin Effectors
Source: PubMed Central journal article supplement (PMC3464108; doi:10.1534/g3.112.003327), 2012-10-01
Supplement: supp_2.10.1161_003327SI.pdf [file supp_2.10.1161_003327SI.pdf]

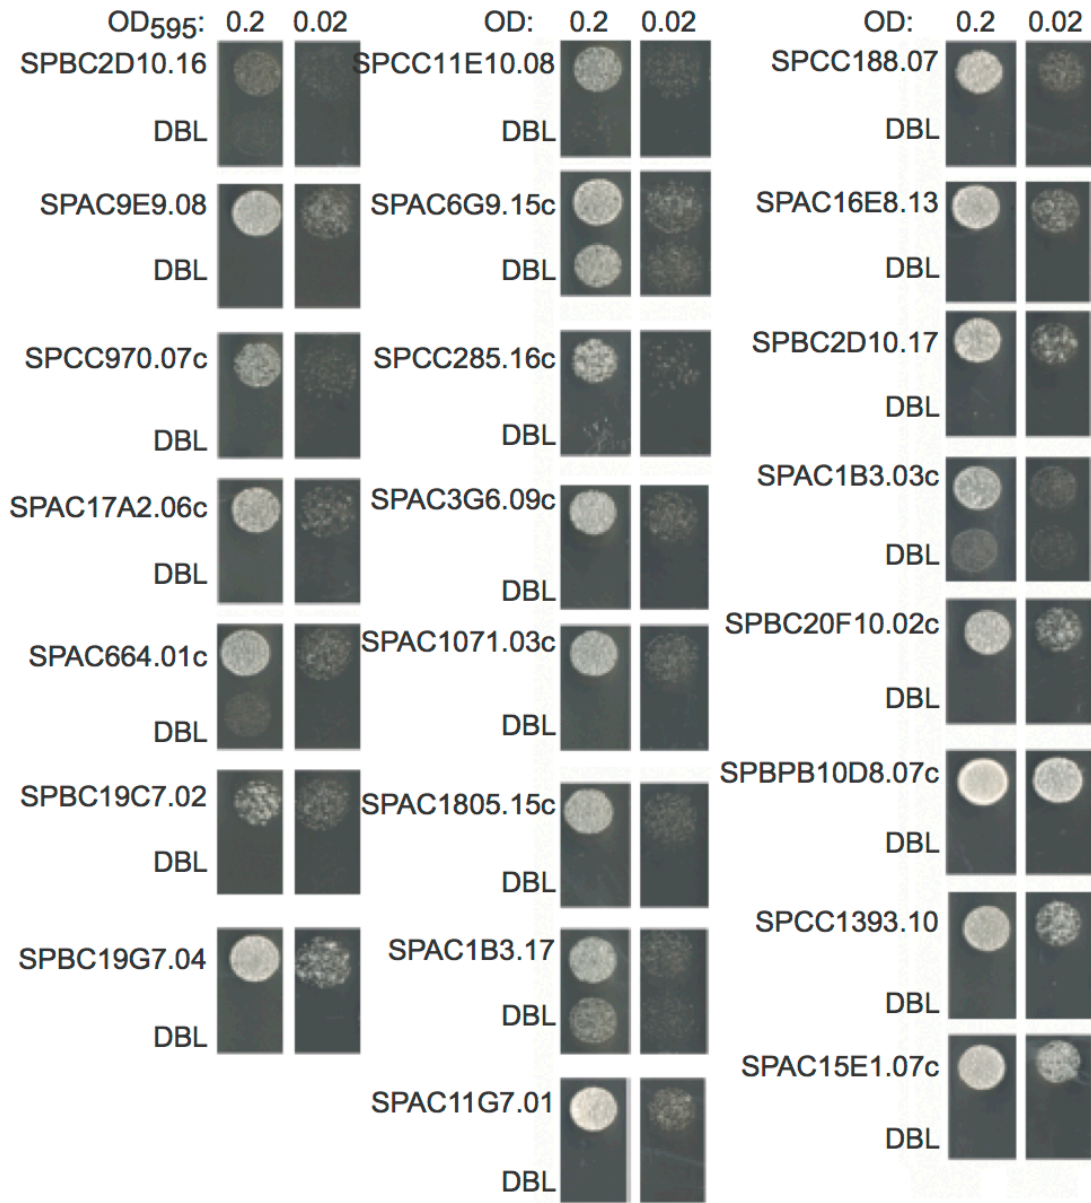

**Figure S1** Growth assays for 22 gene deletions which shows synthetic negative growth with *eso1*-G799D mutant.

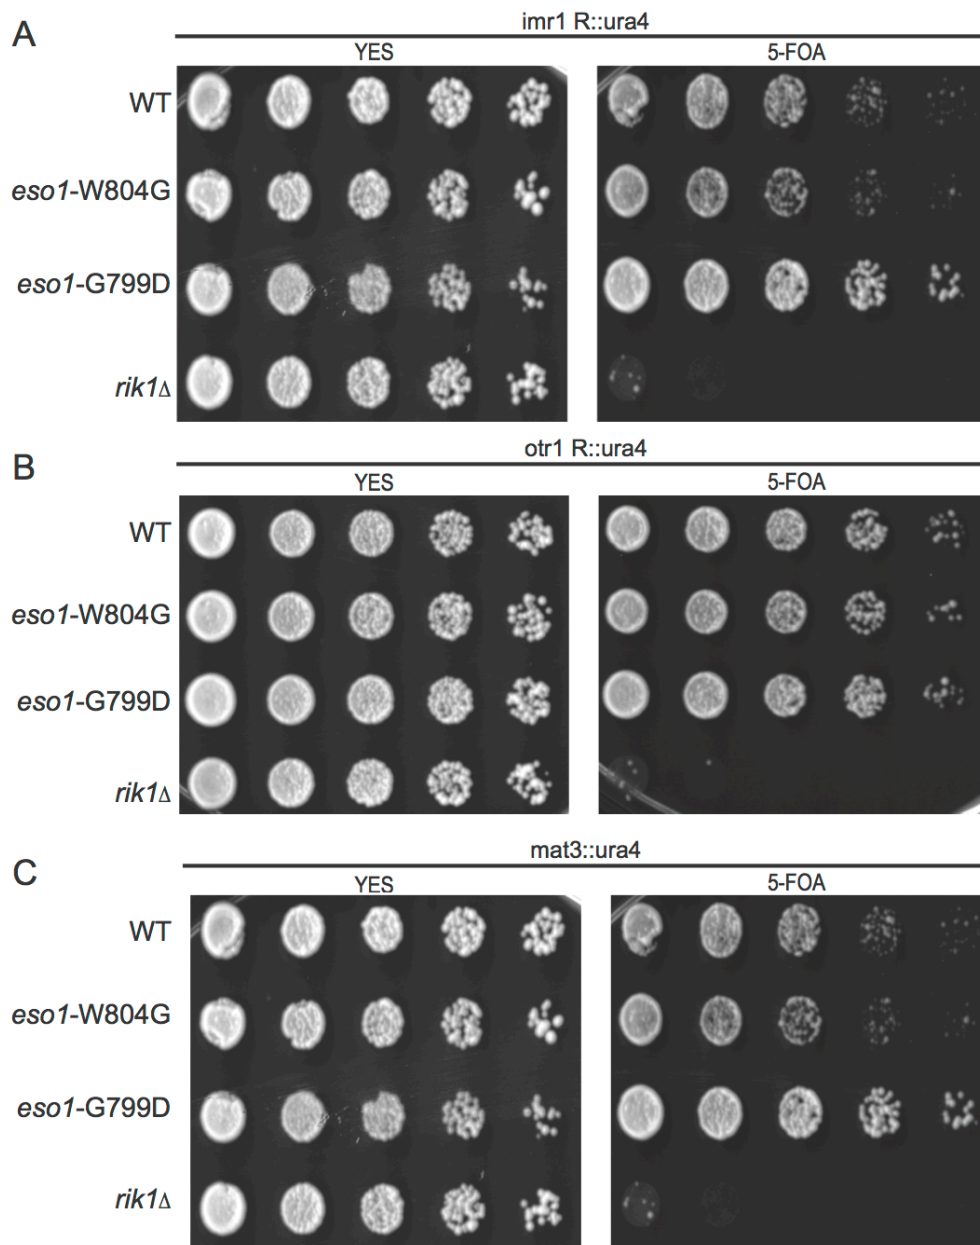

**Figure S2** *eso1* mutation has no effect on silencing of a reporter gene at centromeric and mating type heterochromatin regions. Neither *eso1-G799D* nor *eso1-W804G* mutation has an effect on silencing of *ura4+* reporter gene inserted at (A) inner centromere, (B) outer centromere or (C) mating type heterochromatin regions. The strain with a deletion in *rik1* serves as a control for lack of silencing.

**Table S1 Results of *eso1*-G799D screen**

Available for download at <http://www.g3journal.org/lookup/suppl/doi:10.1534/g3.112.003327/-/DC1>.

Table S2 22 genes with synthetic negative interaction with *eso1-G799D* confirmed by dilution analysis.

| gene          | geneDescription                                             |
|---------------|-------------------------------------------------------------|
| SPBC20F10.02c | DUF1741 family protein                                      |
| SPCC285.16c   | MutS protein homolog                                        |
| SPAC664.01c   | chromodomain protein Swi6                                   |
| SPAC11G7.01   | sequence orphan                                             |
| SPAC17A2.06c  | WD repeat protein Vps8 (predicted)                          |
| SPBC19C7.02   | N-end-recognizing protein Ubr1                              |
| SPBC19G7.04   | HMG box protein                                             |
| SPCC11E10.08  | silencing protein Rik1                                      |
| SPCC970.07c   | Rik1-associated factor Raf2                                 |
| SPBC2D10.16   | FANCM-MHF complex subunit Mhf1                              |
| SPAC16E8.13   | ubiquitin-protein ligase E3 (predicted)                     |
| SPBC2D10.17   | cryptic loci regulator Clr1                                 |
| SPAC9E9.08    | ATRIP, ATR checkpoint kinase regulatory subunit Rad26       |
| SPAC1805.15c  | HECT-type ubiquitin-protein ligase Pub2                     |
| SPCC1393.10   | copper transporter complex subunit Ctr4                     |
| SPAC1B3.03c   | cyclophilin family peptidyl-prolyl cis-trans isomerase Wis2 |
| SPAC3G6.09c   | trehalose-phosphate synthase Tps2 (predicted)               |
| SPAC6G9.15c   | sequence orphan                                             |
| SPAC1B3.17    | chromatin silencing protein Clr2                            |
| SPAC1071.03c  | sequence orphan                                             |
| SPBPB10D8.07c | membrane transporter (predicted)                            |
| SPCC188.07    | telomere maintenance protein Ccq1                           |
| SPAC15E1.07c  | meiotic cohesin complex associated protein Moa1             |

**Table S3 Results of *mis4-242* screen**

Available for download at <http://www.g3journal.org/lookup/suppl/doi:10.1534/g3.112.003327/-/DC1>.

**Table S4** GO term analysis of the genes deletion which showed negative synthetic effect with *eso1-G799D* mutant

| Term Acc   | Term Name                                                       | Enrich | Adj P    |
|------------|-----------------------------------------------------------------|--------|----------|
| GO:0016458 | gene silencing                                                  | OVER   | 4.55E-06 |
| GO:0048523 | negative regulation of cellular process                         | OVER   | 9.05E-06 |
| GO:0007059 | chromosome segregation                                          | OVER   | 2.17E-05 |
| GO:0009892 | negative regulation of metabolic process                        | OVER   | 2.62E-05 |
| GO:0022402 | cell cycle process                                              | OVER   | 2.57E-04 |
| GO:0007049 | cell cycle                                                      | OVER   | 9.44E-04 |
| GO:0019222 | regulation of metabolic process                                 | OVER   | 4.90E-03 |
| GO:0050789 | regulation of biological process                                | OVER   | 5.45E-03 |
| GO:0050794 | regulation of cellular process                                  | OVER   | 1.05E-02 |
| GO:0043233 | organelle lumen                                                 | OVER   | 1.22E-02 |
| GO:0009893 | positive regulation of metabolic process                        | OVER   | 1.27E-02 |
| GO:0043170 | macromolecule metabolic process                                 | OVER   | 1.85E-02 |
| GO:0009058 | biosynthetic process                                            | OVER   | 1.85E-02 |
| GO:0043228 | non-membrane-bounded organelle                                  | OVER   | 2.33E-02 |
| GO:0033036 | macromolecule localization                                      | OVER   | 2.37E-02 |
| GO:0051641 | cellular localization                                           | OVER   | 3.45E-02 |
| GO:0043234 | protein complex                                                 | OVER   | 5.62E-02 |
| GO:0016043 | cellular component organization                                 | OVER   | 6.36E-02 |
| GO:0044238 | primary metabolic process                                       | OVER   | 8.36E-02 |
| GO:0048522 | positive regulation of cellular process                         | OVER   | 8.56E-02 |
| GO:0006807 | nitrogen compound metabolic process                             | OVER   | 8.56E-02 |
| GO:0071841 | cellular component organization or biogenesis at cellular level | OVER   | 9.22E-02 |
| GO:0044446 | intracellular organelle part                                    | OVER   | 9.22E-02 |
| GO:0071821 | FANCM-MHF complex                                               | OVER   | 7.51E-02 |

Table S5 GO term analysis of the genes deletion of which showed negative synthetic effect with *mis4-242* mutant

| Term Acc   | Term Name                                                             | Enrich | Adj P    |
|------------|-----------------------------------------------------------------------|--------|----------|
| GO:000086  | G2/M transition of mitotic cell cycle                                 | OVER   | 2.11E-02 |
| GO:000278  | mitotic cell cycle                                                    | OVER   | 7.90E-03 |
| GO:0006139 | nucleobase, nucleoside, nucleotide and nucleic acid metabolic process | OVER   | 2.17E-02 |
| GO:0006342 | chromatin silencing                                                   | OVER   | 1.51E-02 |
| GO:0007018 | microtubule-based movement                                            | OVER   | 4.35E-02 |
| GO:0007062 | sister chromatid cohesion                                             | OVER   | 1.07E-02 |
| GO:0007530 | sex determination                                                     | OVER   | 1.51E-02 |
| GO:0007531 | mating type determination                                             | OVER   | 1.51E-02 |
| GO:0007535 | donor selection                                                       | OVER   | 4.25E-02 |
| GO:0009890 | negative regulation of biosynthetic process                           | OVER   | 9.42E-03 |
| GO:0010467 | gene expression                                                       | OVER   | 2.01E-02 |
| GO:0010605 | negative regulation of macromolecule metabolic process                | OVER   | 1.37E-02 |
| GO:0019538 | protein metabolic process                                             | OVER   | 4.35E-02 |
| GO:0022403 | cell cycle phase                                                      | OVER   | 1.07E-02 |
| GO:0031323 | regulation of cellular metabolic process                              | OVER   | 1.86E-02 |
| GO:0031324 | negative regulation of cellular metabolic process                     | OVER   | 1.37E-02 |
| GO:0044260 | cellular macromolecule metabolic process                              | OVER   | 7.90E-03 |
| GO:0045165 | cell fate commitment                                                  | OVER   | 1.51E-02 |
| GO:0048519 | negative regulation of biological process                             | OVER   | 7.90E-03 |
| GO:0051171 | regulation of nitrogen compound metabolic process                     | OVER   | 7.90E-03 |
| GO:0051172 | negative regulation of nitrogen compound metabolic process            | OVER   | 7.90E-03 |
| GO:0060255 | regulation of macromolecule metabolic process                         | OVER   | 1.32E-02 |
| GO:0071842 | cellular component organization at cellular level                     | OVER   | 1.86E-02 |
| GO:0080090 | regulation of primary metabolic process                               | OVER   | 1.22E-02 |
| GO:0006974 | response to DNA damage stimulus                                       | OVER   | 1.37E-02 |

**Table S6 Strains**

Available for download at <http://www.g3journal.org/lookup/suppl/doi:10.1534/g3.112.003327/-/DC1>.
