# Supplementary material for: A Genetic Screen to Discover Pathways Affecting Cohesin Function in Schizosaccharomyces pombe Identifies Chromatin Effectors
Source: PubMed Central journal article supplement (PMC3464108; doi:10.1534/g3.112.003327), 2012-10-01
Supplement: supp_2.10.1161_FigureS2.pdf [file supp_2.10.1161_FigureS2.pdf]

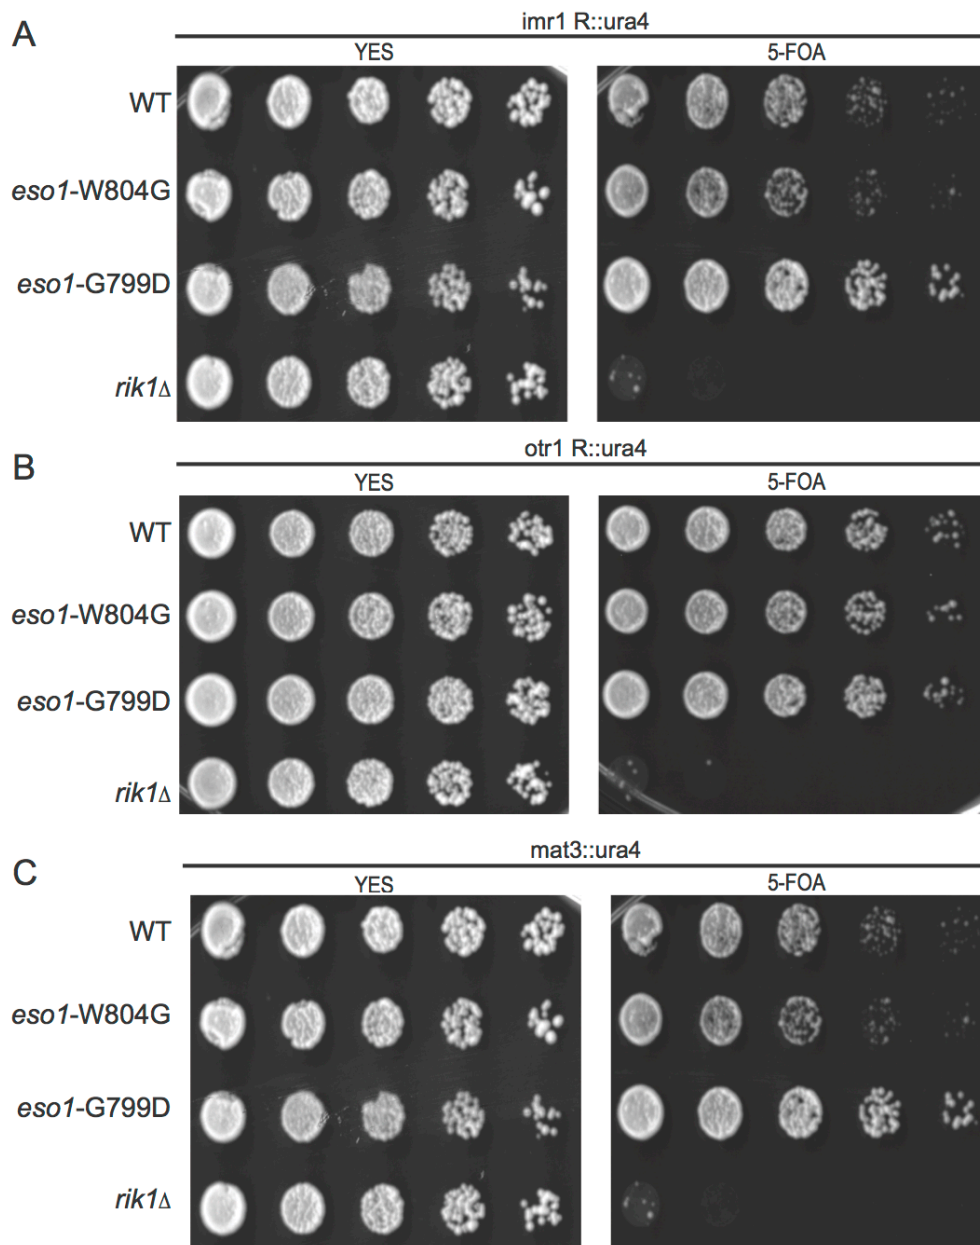

**Figure S2** *eso1* mutation has no effect on silencing of a reporter gene at centromeric and mating type heterochromatin regions. Neither *eso1-G799D* nor *eso1-W804G* mutation has an effect on silencing of *ura4+* reporter gene inserted at (A) inner centromere, (B) outer centromere or (C) mating type heterochromatin regions. The strain with a deletion in *rik1* serves as a control for lack of silencing.
