# Supplementary material for: A Genetic Screen to Discover Pathways Affecting Cohesin Function in Schizosaccharomyces pombe Identifies Chromatin Effectors
Source: PubMed Central journal article supplement (PMC3464108; doi:10.1534/g3.112.003327), 2012-10-01
Supplement: supp_2.10.1161_TableS2.pdf [file supp_2.10.1161_TableS2.pdf]

Table S2 22 genes with synthetic negative interaction with *eso1-G799D* confirmed by dilution analysis.

| gene          | geneDescription                                             |
|---------------|-------------------------------------------------------------|
| SPBC20F10.02c | DUF1741 family protein                                      |
| SPCC285.16c   | MutS protein homolog                                        |
| SPAC664.01c   | chromodomain protein Swi6                                   |
| SPAC11G7.01   | sequence orphan                                             |
| SPAC17A2.06c  | WD repeat protein Vps8 (predicted)                          |
| SPBC19C7.02   | N-end-recognizing protein Ubr1                              |
| SPBC19G7.04   | HMG box protein                                             |
| SPCC11E10.08  | silencing protein Rik1                                      |
| SPCC970.07c   | Rik1-associated factor Raf2                                 |
| SPBC2D10.16   | FANCM-MHF complex subunit Mhf1                              |
| SPAC16E8.13   | ubiquitin-protein ligase E3 (predicted)                     |
| SPBC2D10.17   | cryptic loci regulator Clr1                                 |
| SPAC9E9.08    | ATRIP, ATR checkpoint kinase regulatory subunit Rad26       |
| SPAC1805.15c  | HECT-type ubiquitin-protein ligase Pub2                     |
| SPCC1393.10   | copper transporter complex subunit Ctr4                     |
| SPAC1B3.03c   | cyclophilin family peptidyl-prolyl cis-trans isomerase Wis2 |
| SPAC3G6.09c   | trehalose-phosphate synthase Tps2 (predicted)               |
| SPAC6G9.15c   | sequence orphan                                             |
| SPAC1B3.17    | chromatin silencing protein Clr2                            |
| SPAC1071.03c  | sequence orphan                                             |
| SPBPB10D8.07c | membrane transporter (predicted)                            |
| SPCC188.07    | telomere maintenance protein Ccq1                           |
| SPAC15E1.07c  | meiotic cohesin complex associated protein Moa1             |
