# Supplementary material for: A Genetic Screen to Discover Pathways Affecting Cohesin Function in Schizosaccharomyces pombe Identifies Chromatin Effectors
Source: PubMed Central journal article supplement (PMC3464108; doi:10.1534/g3.112.003327), 2012-10-01
Supplement: supp_2.10.1161_TableS4.pdf [file supp_2.10.1161_TableS4.pdf]

**Table S4** GO term analysis of the genes deletion which showed negative synthetic effect with *eso1-G799D* mutant

| Term Acc   | Term Name                                                       | Enrich | Adj P    |
|------------|-----------------------------------------------------------------|--------|----------|
| GO:0016458 | gene silencing                                                  | OVER   | 4.55E-06 |
| GO:0048523 | negative regulation of cellular process                         | OVER   | 9.05E-06 |
| GO:0007059 | chromosome segregation                                          | OVER   | 2.17E-05 |
| GO:0009892 | negative regulation of metabolic process                        | OVER   | 2.62E-05 |
| GO:0022402 | cell cycle process                                              | OVER   | 2.57E-04 |
| GO:0007049 | cell cycle                                                      | OVER   | 9.44E-04 |
| GO:0019222 | regulation of metabolic process                                 | OVER   | 4.90E-03 |
| GO:0050789 | regulation of biological process                                | OVER   | 5.45E-03 |
| GO:0050794 | regulation of cellular process                                  | OVER   | 1.05E-02 |
| GO:0043233 | organelle lumen                                                 | OVER   | 1.22E-02 |
| GO:0009893 | positive regulation of metabolic process                        | OVER   | 1.27E-02 |
| GO:0043170 | macromolecule metabolic process                                 | OVER   | 1.85E-02 |
| GO:0009058 | biosynthetic process                                            | OVER   | 1.85E-02 |
| GO:0043228 | non-membrane-bounded organelle                                  | OVER   | 2.33E-02 |
| GO:0033036 | macromolecule localization                                      | OVER   | 2.37E-02 |
| GO:0051641 | cellular localization                                           | OVER   | 3.45E-02 |
| GO:0043234 | protein complex                                                 | OVER   | 5.62E-02 |
| GO:0016043 | cellular component organization                                 | OVER   | 6.36E-02 |
| GO:0044238 | primary metabolic process                                       | OVER   | 8.36E-02 |
| GO:0048522 | positive regulation of cellular process                         | OVER   | 8.56E-02 |
| GO:0006807 | nitrogen compound metabolic process                             | OVER   | 8.56E-02 |
| GO:0071841 | cellular component organization or biogenesis at cellular level | OVER   | 9.22E-02 |
| GO:0044446 | intracellular organelle part                                    | OVER   | 9.22E-02 |
| GO:0071821 | FANCM-MHF complex                                               | OVER   | 7.51E-02 |
