# Supplementary material for: A Genetic Screen to Discover Pathways Affecting Cohesin Function in Schizosaccharomyces pombe Identifies Chromatin Effectors
Source: PubMed Central journal article supplement (PMC3464108; doi:10.1534/g3.112.003327), 2012-10-01
Supplement: supp_2.10.1161_TableS5.pdf [file supp_2.10.1161_TableS5.pdf]

Table S5 GO term analysis of the genes deletion of which showed negative synthetic effect with *mis4-242* mutant

| Term Acc   | Term Name                                                             | Enrich | Adj P    |
|------------|-----------------------------------------------------------------------|--------|----------|
| GO:000086  | G2/M transition of mitotic cell cycle                                 | OVER   | 2.11E-02 |
| GO:000278  | mitotic cell cycle                                                    | OVER   | 7.90E-03 |
| GO:0006139 | nucleobase, nucleoside, nucleotide and nucleic acid metabolic process | OVER   | 2.17E-02 |
| GO:0006342 | chromatin silencing                                                   | OVER   | 1.51E-02 |
| GO:0007018 | microtubule-based movement                                            | OVER   | 4.35E-02 |
| GO:0007062 | sister chromatid cohesion                                             | OVER   | 1.07E-02 |
| GO:0007530 | sex determination                                                     | OVER   | 1.51E-02 |
| GO:0007531 | mating type determination                                             | OVER   | 1.51E-02 |
| GO:0007535 | donor selection                                                       | OVER   | 4.25E-02 |
| GO:0009890 | negative regulation of biosynthetic process                           | OVER   | 9.42E-03 |
| GO:0010467 | gene expression                                                       | OVER   | 2.01E-02 |
| GO:0010605 | negative regulation of macromolecule metabolic process                | OVER   | 1.37E-02 |
| GO:0019538 | protein metabolic process                                             | OVER   | 4.35E-02 |
| GO:0022403 | cell cycle phase                                                      | OVER   | 1.07E-02 |
| GO:0031323 | regulation of cellular metabolic process                              | OVER   | 1.86E-02 |
| GO:0031324 | negative regulation of cellular metabolic process                     | OVER   | 1.37E-02 |
| GO:0044260 | cellular macromolecule metabolic process                              | OVER   | 7.90E-03 |
| GO:0045165 | cell fate commitment                                                  | OVER   | 1.51E-02 |
| GO:0048519 | negative regulation of biological process                             | OVER   | 7.90E-03 |
| GO:0051171 | regulation of nitrogen compound metabolic process                     | OVER   | 7.90E-03 |
| GO:0051172 | negative regulation of nitrogen compound metabolic process            | OVER   | 7.90E-03 |
| GO:0060255 | regulation of macromolecule metabolic process                         | OVER   | 1.32E-02 |
| GO:0071842 | cellular component organization at cellular level                     | OVER   | 1.86E-02 |
| GO:0080090 | regulation of primary metabolic process                               | OVER   | 1.22E-02 |
| GO:0006974 | response to DNA damage stimulus                                       | OVER   | 1.37E-02 |
